# Supplementary material for: Lipid Raft Association and Cholesterol Sensitivity of P2X1-4 Receptors for ATP: CHIMERAS AND POINT MUTANTS IDENTIFY INTRACELLULAR AMINO-TERMINAL RESIDUES INVOLVED IN LIPID REGULATION OF P2X1 RECEPTORS
Source: PubMed Central journal article supplement — J Biol Chem. 2010 Aug 10;285(43):32770–7. doi: 10.1074/jbc.M110.148940 (PMC2963349; doi:10.1074/jbc.m110.148940), 2010-08-10
Supplement: supp_M110.148940_jbc.M110.148940-1.pdf [file supp_M110.148940_jbc.M110.148940-1.pdf]

**Supplementary figure 1. Localisation of the P2X4 receptor and the lysosome marker LAMP-1 within lipid rafts.** HEK 293 cells stably expressing P2X4 receptors were apyrase treated (3.2 U/ml, 1 hr) and then lysed in either Na<sub>2</sub>CO<sub>3</sub> (500 mM, pH 11) or MBS in the presence of triton X-100. After separation of lysates on density sucrose gradients, fractions 3-11 were immunoblotted for LAMP-1 lysosomal marker, P2X4 and the lipid raft marker flotillin-2. Predominant expression of P2X4 and lysosomes was within the lipid raft fractions as indicated by flotillin-2. However, increasing the concentration of triton X-100 to 1% relocated both P2X4 and lysosomes to outside of the lipid rafts. All bands were of the appropriate size (LAMP-1 ~ 120 kDa, P2X4 ~50 kDa, flotillin-2 ~ 42 kDa). Blots are representative of those from 3 separate experiments.

**Supplementary figure 2. Chimera P2X1-2a $\beta$  receptor association with lipid rafts.** (a.) Schematic representing the structure of chimera P2X1-2a $\beta$ . P2X1 receptor amino acids 16-30 have been replaced for those of the P2X2 receptor. (b.) HEK 293 cells stably expressing chimera P2X1-2a $\beta$  were lysed in either Na<sub>2</sub>CO<sub>3</sub> (500 mM, pH 11) after ATP treatment (100  $\mu$ M, 10 min), or lysed in the presence of Triton X-100. Lysates were separated by sucrose density gradients and fractions 3-11 immunoblotted for P2X1, the lipid raft marker flotillin-2 and the non-raft marker  $\beta$ -adapitin. Chimera P2X1-2a $\beta$  expression was similar to that of P2X1 - expressed in the raft fractions following treatment with ATP (corresponding with the location of flotillin-2) and redistributed predominantly to the non raft fractions (as indicated by the non-raft marker  $\beta$ -arrestin) in the presence of triton X-100. (c.) HEK 293 cells expressing P2X1 or chimera P2X1-2a $\beta$  were incubated for 24 hrs in lipofectamine 2000 and then lysed (Na<sub>2</sub>CO<sub>3</sub> 500 mM, pH 11), separated by sucrose density gradients and fractions immunoblotted for P2X1, flotillin-2 and  $\beta$ -adapitin. Lipofectamine treatment (30  $\mu$ l in a T75 flask for 24 hours) had no effect on the distribution of the P2X receptors following density centrifugation. All bands were of the appropriate size (P2X1 ~ 55 kDa, flotillin-2 ~ 42 kDa and  $\beta$ -adapitin ~ 106 kDa). Blots are representative of those from 3 separate experiments.

**Supplementary figure 3. Lipid raft disruption by m $\beta$ -CD and filipin has no effect on currents evoked by EC<sub>50</sub> or maximal concentration of ATP for P2X2, P2X3 and P2X4 receptors.** Summary data of m $\beta$ -CD (10 mM for 1h) on P2X2&3 and filipin (10  $\mu$ M for 20 min) on P2X4 receptor-mediated currents evoked by application of different concentrations of ATP (n > 6 for each). Data shown are normalised to currents evoked under control conditions for either EC<sub>50</sub> or maximal ATP concentrations.

**Supplementary figure 4. Lipid raft disruption sensitivity is independent of receptor desensitization time-course.** Summary of the effects of m $\beta$ -CD treatment compared to their time-course of desensitization for currents mediated by P2X1 (star), P2X1-2a, P2X1-2b, P2X1-2c, P2X1-2d, P2X1-2e $\alpha$  P2X1-2e $\beta$  chimeric receptors (solid circles) and P2X1 receptors with point mutations (open diamonds) compared to the response to ATP in non-treated cells. Three P2X1 receptors with point mutations (M21C, L23C and K28C, within grey shadow) have time courses of desensitization similar to P2X1 but different sensitivities to m $\beta$ -CD treatment.

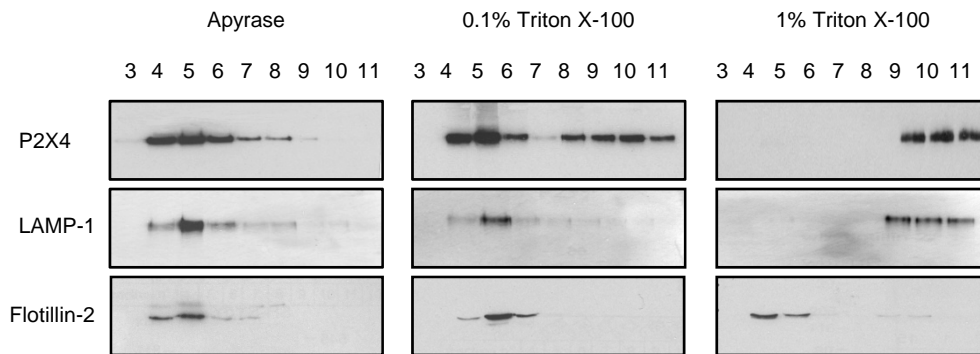

**Supplementary figure 1. Localisation of the P2X4 receptor and the lysosome marker LAMP-1 within lipid rafts.** HEK 293 cells stably expressing P2X4 receptors were apyrase treated (3.2 U/ml, 1 hr) and then lysed in either  $\text{Na}_2\text{CO}_3$  (500 mM, pH 11) or MBS in the presence of triton X-100. After separation of lysates on density sucrose gradients, fractions 3-11 were immunoblotted for LAMP-1 lysosomal marker, P2X4 and the lipid raft marker flotillin-2. Predominant expression of P2X4 and lysosomes was within the lipid raft fractions as indicated by flotillin-2. However, increasing the concentration of triton X-100 to 1% relocated both P2X4 and lysosomes to outside of the lipid rafts. All bands were of the appropriate size (LAMP-1 ~ 120 kDa, P2X4 ~50 kDa, flotillin-2 ~ 42 kDa). Blots are representative of those from 3 separate experiments.

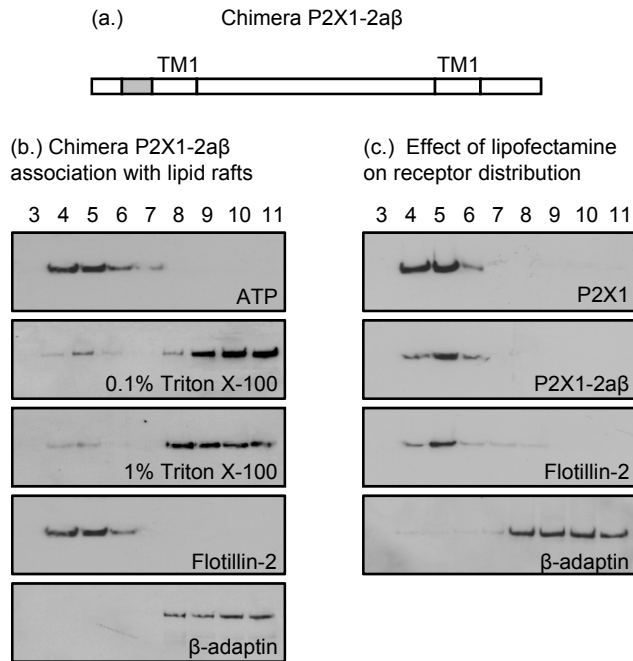

**Supplementary figure 2. Chimera P2X1-2a $\beta$  receptor association with lipid rafts.** (a.) Schematic representing the structure of chimera P2X1-2a $\beta$ . P2X1 receptor amino acids 16-30 have been replaced for those of the P2X2 receptor. (b.) HEK 293 cells stably expressing chimera P2X1-2a $\beta$  were lysed in either Na<sub>2</sub>CO<sub>3</sub> (500 mM, pH 11) after ATP treatment (100  $\mu$ M, 10 min), or lysed in the presence of Triton X-100. Lysates were separated by sucrose density gradients and fractions 3-11 immunoblotted for P2X1, the lipid raft marker flotillin-2 and the non-raft marker  $\beta$ -adaplin. Chimera P2X1-2a $\beta$  expression was similar to that of P2X1 - expressed in the raft fractions following treatment with ATP (corresponding with the location of flotillin-2) and redistributed predominantly to the non raft fractions (as indicated by the non-raft marker  $\beta$ -arrestin) in the presence of triton X-100. (c.) HEK 293 cells expressing P2X1 or chimera P2X1-2a $\beta$  were incubated for 24 hrs in lipofectamine 2000 and then lysed (Na<sub>2</sub>CO<sub>3</sub> 500 mM, pH 11), separated by sucrose density gradients and fractions immunoblotted for P2X1, flotillin-2 and  $\beta$ -adaplin. Lipofectamine treatment (30  $\mu$ l in a T75 flask for 24 hours) had no effect on the distribution of the P2X receptors. All bands were of the appropriate size (P2X1 ~ 55 kDa, flotillin-2 ~ 42 kDa and  $\beta$ -adaplin ~ 106 kDa). Blots are representative of those from 3 separate experiments.

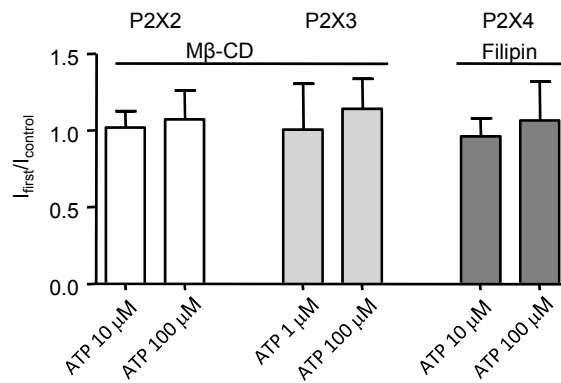

**Supplementary Figure 3. Lipid raft disruption by mβ-CD and filipin has no effect on currents evoked by EC<sub>50</sub> or maximal concentration of ATP for P2X2, P2X3 and P2X4 receptors.** Summary data of mβ-CD (10 mM for 1h) on P2X2&3 and filipin (10 μM for 20 min) on P2X4 receptor-mediated currents evoked by application of different concentrations of ATP (n > 6 for each). Data shown are normalised to currents evoked under control conditions for either EC<sub>50</sub> or maximal ATP concentrations.

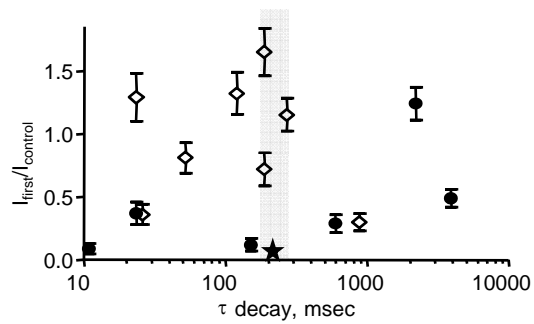

**Supplementary figure 4. Lipid raft disruption sensitivity is independent of receptor desensitization time-course.** Summary of the effects of m $\beta$ -CD treatment compared to their time-course of desensitization for currents mediated by P2X1 (star), P2X1-2a, P2X1-2b, P2X1-2c, P2X1-2d, P2X1-2e $\alpha$ , P2X1-2e $\beta$  chimeric receptors (solid circles) and P2X1 receptors with point mutations (open diamonds) compared to the response to ATP in non-treated cells. Three P2X1 receptors with point mutations (M21C, L23C and K28C, within grey shadow) have time courses of desensitization similar to P2X1 but different sensitivities to m $\beta$ -CD treatment.
